# Supplementary material for: Dynamical footprints enable detection of disease emergence
Source: PLoS Biol. 2020 May 20;18(5):e3000697. doi: 10.1371/journal.pbio.3000697 (PMC7239390; doi:10.1371/journal.pbio.3000697)
Supplement: S3 Table — At the beginning of each aggregation period C is reset to 0. (DOCX) [file pbio.3000697.s004.docx]

| **S3 Table Transitions of the SEIR transmission model.** | | | | | | |
| --- | --- | --- | --- | --- | --- | --- |
|  | Transition effects | | | | |  |
| Transition name |  |  |  |  | * | Propensity |
| birth of | 1 | 0 | 0 | 0 | 0 |  |
| death of | -1 | 0 | 0 | 0 | 0 |  |
| death of | 0 | -1 | 0 | 0 | 0 |  |
| death of | 0 | 0 | -1 | 0 | 0 |  |
| death of | 0 | 0 | 0 | -1 | 0 |  |
| importation | -1 | 1 | 0 | 0 | 0 |  |
| transmission | -1 | 1 | 0 | 0 | 0 |  |
| to | 0 | -1 | 1 | 0 | 0 |  |
| recovery | 0 | 0 | -1 | 1 | 1 |  |
